# Supplementary material for: Mesostructured zeolite Y—high hydrothermal stability and superior FCC catalytic performance
Source: Royal Society of Chemistry journal article supplement (doi:10.1039/c2cy00309k), 2012-01-01
Supplement: c2cy00309k.pdf [file c2cy00309k.pdf]

## Supporting Information

### Mesostructured Zeolite Y - High Hydrothermal Stability and Superior FCC Catalytic Performance

Javier García-Martínez,\* Marvin Johnson, Julia Valla, Kunhao Li, and Jackie Y. Ying\*

#### Experimental Section

**MAT Experiments:** The MAT experiments were conducted at the National Centre for Upgrading Technology (NCUT) in Edmonton, Canada using a fluid fixed bed reactor system at 500°C. The feedstock was a VGO with API 22.2, CCR 0.42%, sulfur content 0.48 wt%, IBP 241C and FBP 603C. To obtain different feed conversions (at least three for each zeolite), the catalyst/oil ratio was varied, while keeping the catalyst contact time constant at 60 s, with different amounts of oil delivered into the reactor through a syringe pump. The collected liquid products were weighed, and analyzed by simulated distillation (ASTM D 2887) to determine the yields of gasoline (IBP/216 °C), LCO (216/343°C) and heavy cycle oil (HCO, +343°C). Gaseous products analyzed by a gas chromatograph included dry gas (H<sub>2</sub>-C<sub>2</sub>) and liquefied petroleum gas (LPG, C<sub>3</sub> and C<sub>4</sub>). Coke deposited on the catalyst after cracking was determined by *in situ* combustion through the use of a CO<sub>2</sub> absorber. For each MAT test, the conversion was calculated based on the portion of the feed converted to 216°C products including gas and coke.

**Table S1:** Micropore volume, mesopore volume and unit cell size of the samples described in Figures 8 and 9.

|                                                             | Micropore volume<br>[Pores of 0–20 Å,<br>cc/g] | Mesopore volume <sup>[a]</sup><br>[Pores of 20–135 Å,<br>cc/g] | BET<br>[m <sup>2</sup> /g] | External<br>Surface Area<br>[m <sup>2</sup> /g] | Unit cell<br>size [Å] |
|-------------------------------------------------------------|------------------------------------------------|----------------------------------------------------------------|----------------------------|-------------------------------------------------|-----------------------|
| Zeolite NH <sub>4</sub> Y                                   | 0.38                                           | 0.03                                                           | 970                        | 22                                              | 24.70                 |
| Mesostructured<br>zeolite Y <sup>[b]</sup>                  | 0.37                                           | 0.16                                                           | 916                        | 243                                             | 24.67                 |
| Mesostructured<br>zeolite USY <sup>[b]</sup>                | 0.27                                           | 0.16                                                           | 812                        | 152                                             | 24.55                 |
| Steamed meso-<br>structured<br>zeolite USY <sup>[b,c]</sup> | 0.24                                           | 0.16                                                           | 661                        | 136                                             | 24.35                 |
| Conventional<br>USY (CBV500)                                | 0.32                                           | 0.04                                                           | 857                        | 75                                              | 24.55                 |

[a] The 20-135 Å mesopore range was chosen to capture the characteristic mesoporosity introduced by this technique. [b] The zeolites contained ~ 5% rare earth oxides. [c] Steaming was conducted at 1450 °F under 100% steam for 4 h.

**Table S2:** XPS analysis results of a deep-bed calcined mesostructured NH<sub>4</sub>-Y.

|             | C    | O     | Si    | Al   | N    | Si/Al |
|-------------|------|-------|-------|------|------|-------|
| Surface     | 5.67 | 63.28 | 21.93 | 7.25 | 1.87 | 3.02  |
| 250 nm deep | 0.55 | 65.22 | 25.82 | 7.55 | 0.85 | 3.42  |

**Table S3:** Yields at 78% conversion for the catalyst comparison shown in Figure 10.

| Products at 78% Conversion | Catalyst with mesostructured zeolite [wt%] | Catalyst with conventional zeolite [wt%] | Absolute difference [wt%] | Relative difference [%] |
|----------------------------|--------------------------------------------|------------------------------------------|---------------------------|-------------------------|
| Gasoline                   | 54.67                                      | 52.18                                    | +2.50                     | +4.8                    |
| Diesel                     | 16.45                                      | 15.40                                    | +1.05                     | +6.8                    |
| Coke                       | 2.77                                       | 2.97                                     | -0.20                     | -6.7                    |
| Gases                      | 20.56                                      | 22.86                                    | -2.30                     | -10.1                   |
| Bottoms                    | 5.55                                       | 6.60                                     | -1.05                     | -15.9                   |

**Table S4:** Properties of the mesoporous zeolites prepared by the newly developed surfactant-free process.

|                                                   | Micropore volume [Pores of 0–20 Å, cc/g] | Mesopore volume <sup>[a]</sup> [Pores of 20–135 Å, cc/g] | Crystallinity [%] | Unit cell size [Å] |
|---------------------------------------------------|------------------------------------------|----------------------------------------------------------|-------------------|--------------------|
| Zeolite NaY                                       | 0.40                                     | 0.03                                                     | 95                | 24.66              |
| Mesostructured zeolite USY                        | 0.34                                     | 0.15                                                     | 72                | 24.50              |
| Steamed mesostructured zeolite USY <sup>[b]</sup> | 0.18                                     | 0.14                                                     | 57                | 24.25              |
| Conventional USY (CBV500)                         | 0.33                                     | 0.06                                                     | 86                | 24.54              |

[a] The 20–135 Å mesopore range was chosen to capture the characteristic mesoporosity introduced by this technique. [b] Steaming was conducted at 1450 °F under 100% steam for 8 h.

Conventional CBV720:

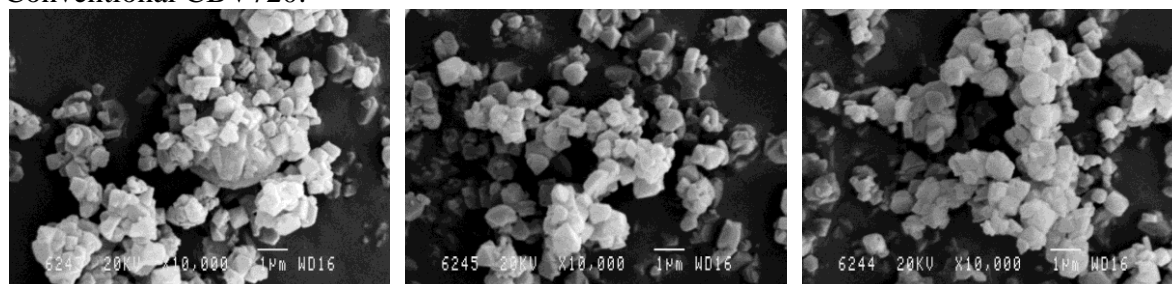

Mesostructured CBV720:

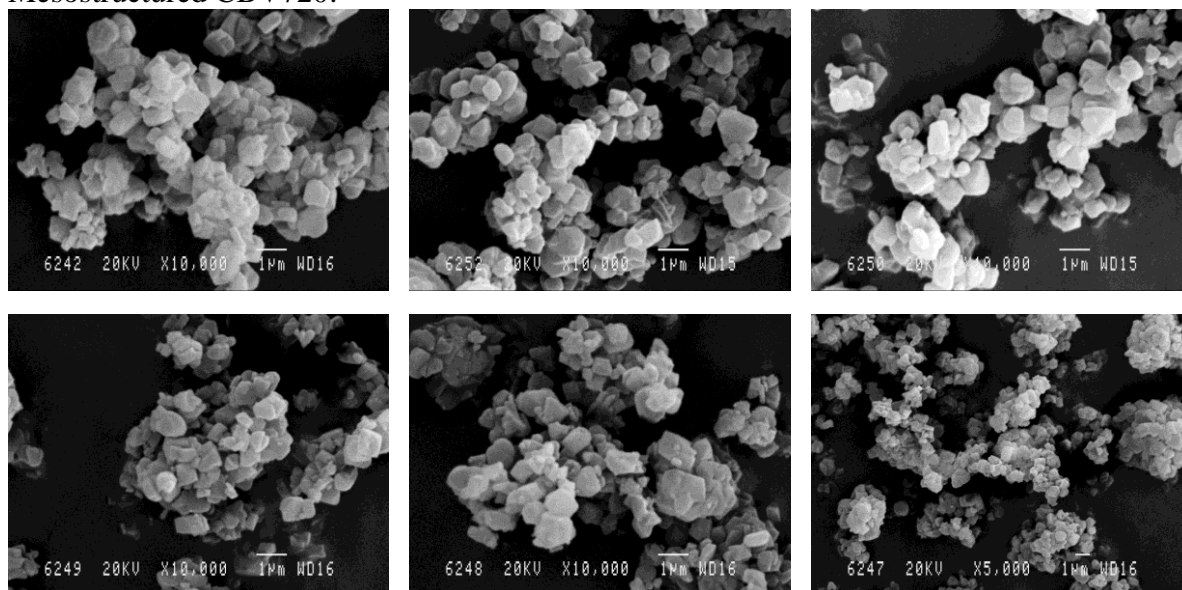

Conventional CBV100 (NaY):

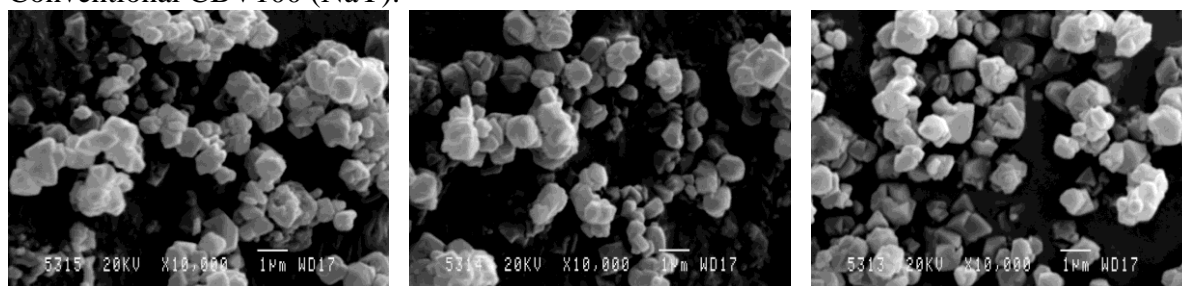

Mesostructured CBV100:

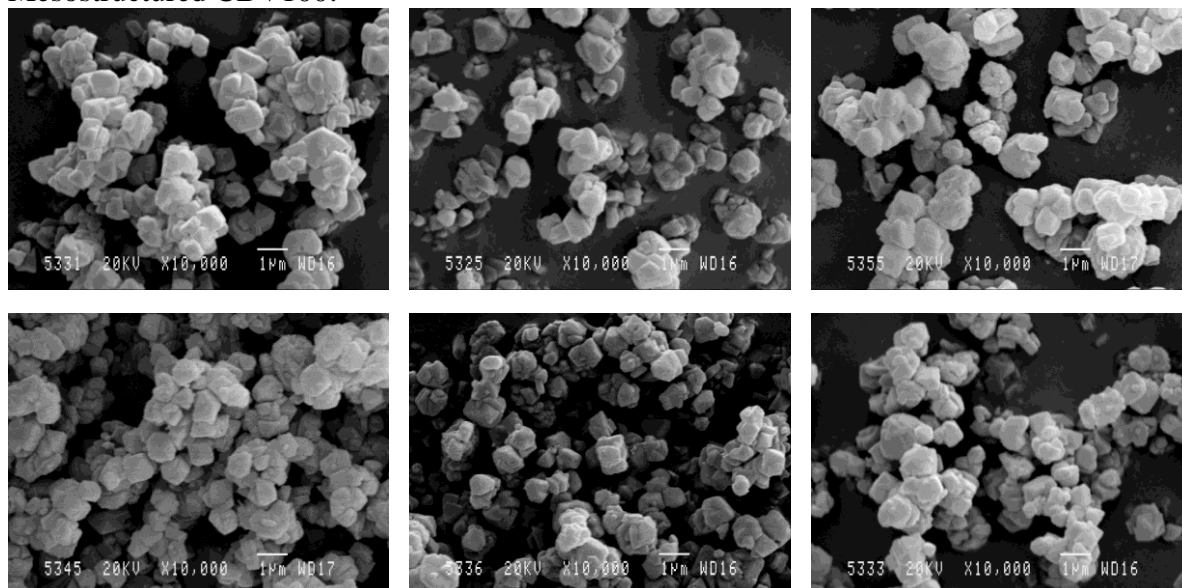

**Figure S1.** Additional SEM images of conventional and mesostructured Y zeolites.

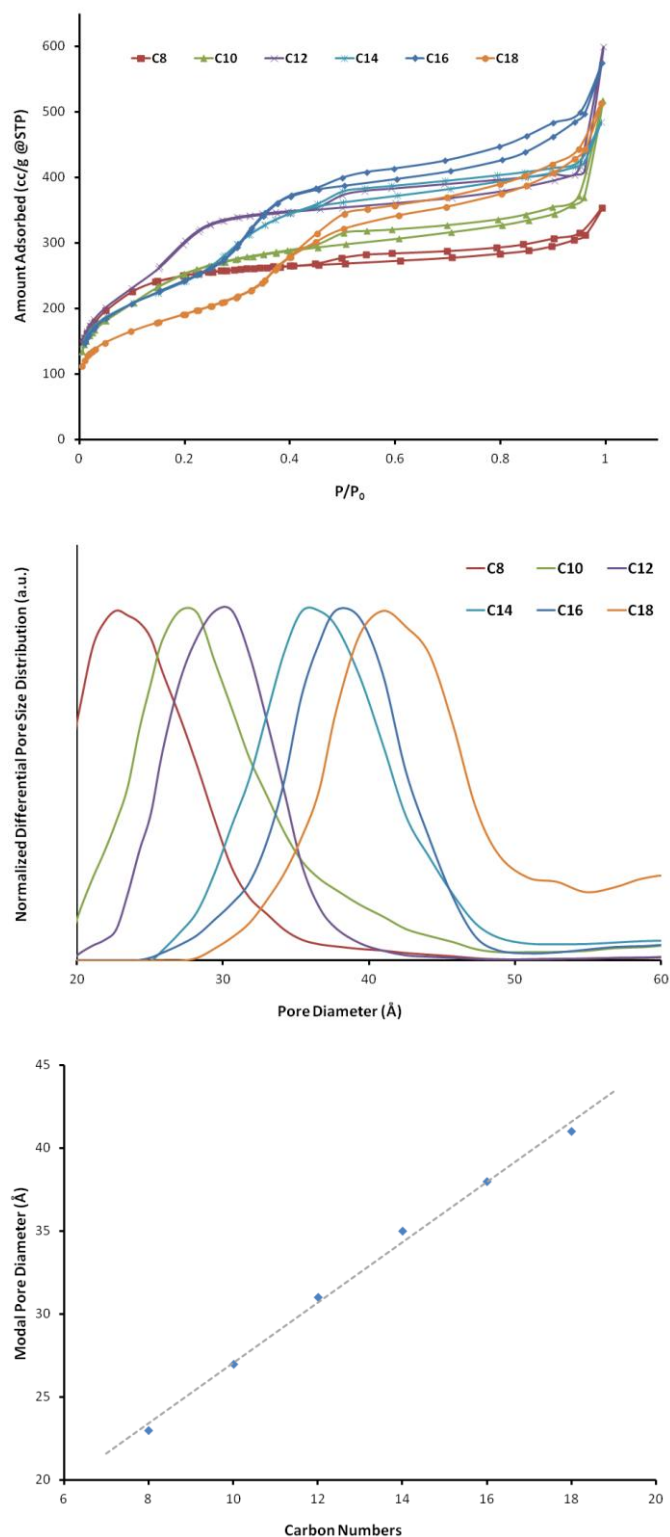

**Figure S2.** Nitrogen adsorption isotherms (top), NLDFT pore size distributions (middle, normalized peak heights to better demonstrate the size correspondence with surfactant size), and a linear correlation of the modal mesopore diameters with the carbon numbers of the long alkyl chains in the surfactants used to prepare a series of mesostructured NH<sub>4</sub>-Y zeolites under the same reaction conditions. C8 (octyltrimethylammonium bromide), C10

(decyltrimethylammonium bromide), C12 (dodecyltrimethyl-ammonium bromide), C14 (tetradecyltrimethylammonium bromide), C16 (cetyltrimethylammonium bromide), and C18 (octadecyltrimethylammonium bromide). All chemicals are from Aldrich.

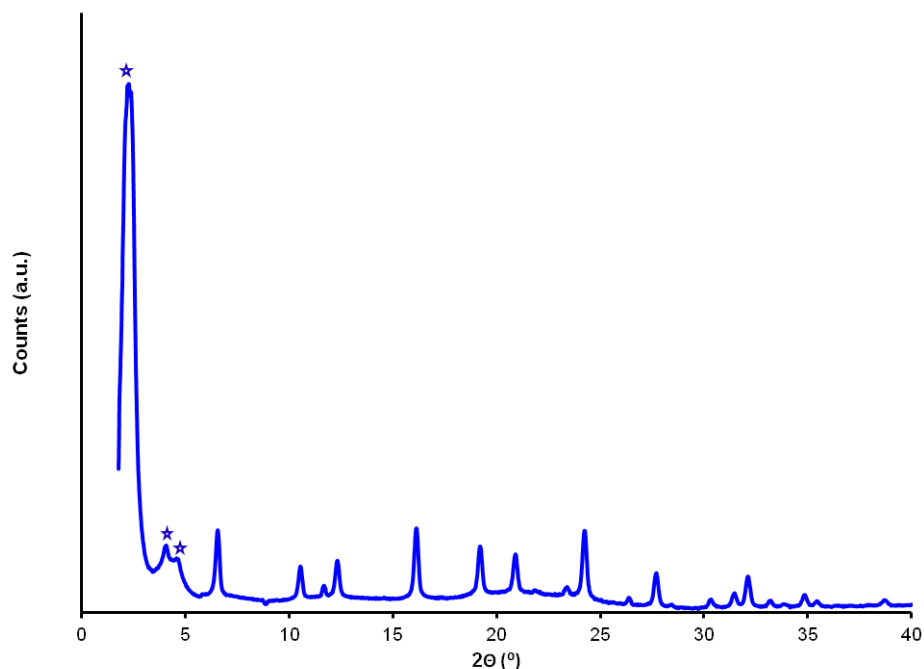

**Figure S3.** XRD pattern of mesostructured CBV720 showing the (100), (110) and (210) peaks (asterisked) due to the hexagonal ordering ( $a_0=44.7$  Å, determined by  $a_0=2d_{100}/\sqrt{3}$ ) of the mesopores ( $2\theta < 5^\circ$ ) and peaks that are characteristic of zeolite Y ( $2\theta > 5^\circ$ ). Additional XRD patterns showing hexagonal ordering of the mesopores are available in reference 50.

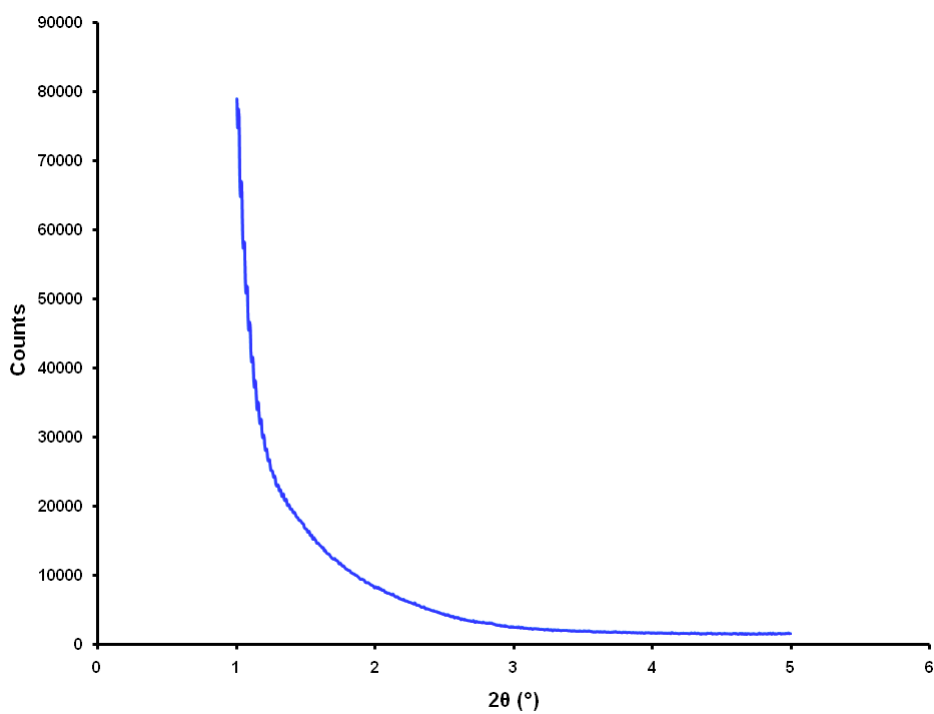

**Figure S4.** Low angle ( $2\theta = 1-5^\circ$ ) XRD scan of the mesostructured Y described in Figure 8 and 9 showing no diffraction peaks, suggesting the mesopore are not ordered.

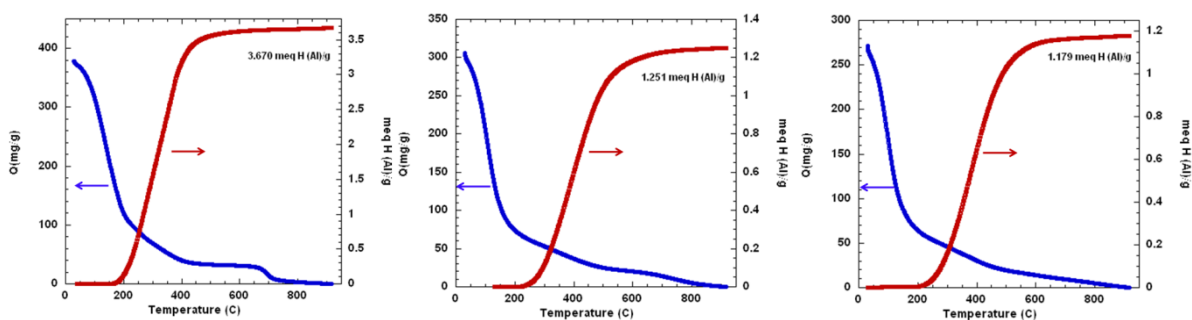

**Figure S5.** TPD) results of the starting  $\text{NH}_4\text{-Y}$  (CBV300, left), a conventional USY (CBV500, center) and a mesostructured USY (right).

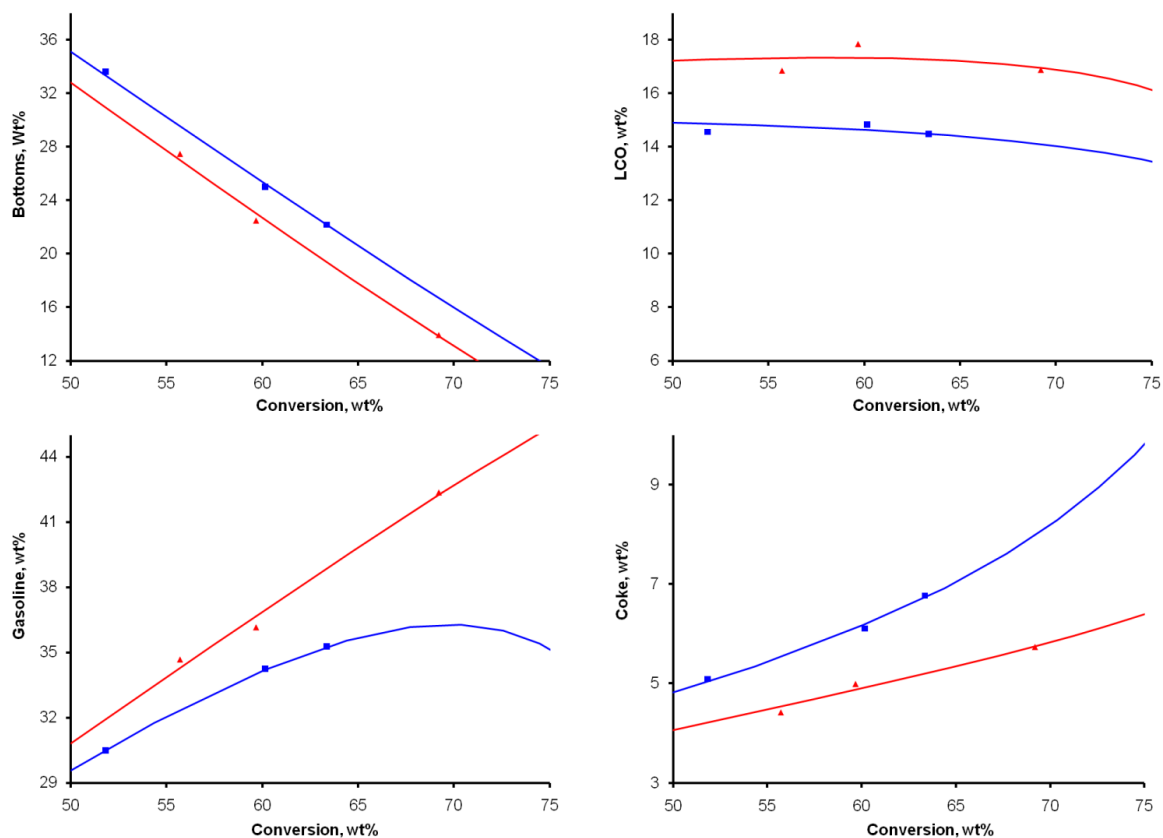

**Figure S6.** The MAT test results of (red triangle) mesostructured zeolite USY and (blue square) conventional zeolite USY. The zeolites were ultrastabilized, and then deactivated at 1450°F in 100% steam for 4 h before being tested. The curves were fitted by a kinetic lump model.
